# Supplementary material for: Theoretical studies of optoelectronic, magnetization and heat transport properties of conductive metal adatoms adsorbed on edge chlorinated nanographenes
Source: Royal Society of Chemistry journal article supplement (doi:10.1039/c8ra02032a), 2018-01-01
Supplement: c8ra02032a1.pdf [file c8ra02032a1.pdf]

## Supplementary Information

**Title: Theoretical studies of optoelectronic, magnetization and heat transport properties of conductive metal adatoms adsorbed on edge chlorinated nanographenes**

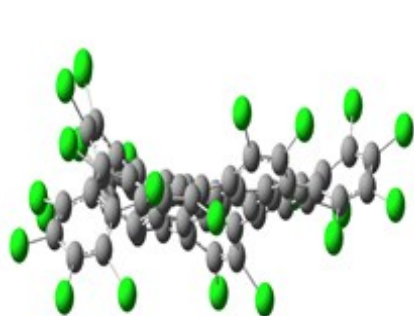

C4(C<sub>60</sub>Cl<sub>24</sub>)

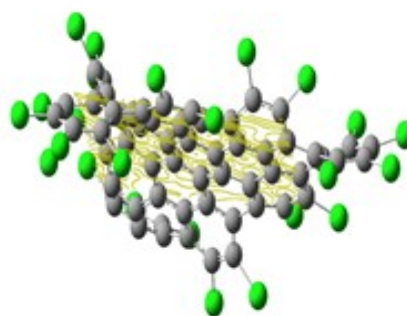

C4 (ESP -2189.11au)

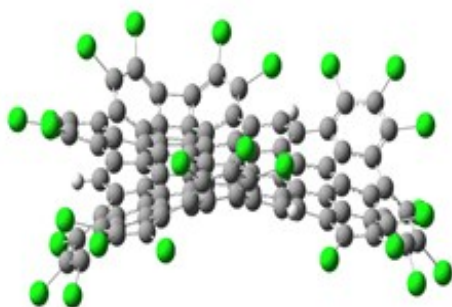

C5(C<sub>96</sub>Cl<sub>27</sub>H<sub>3</sub>)

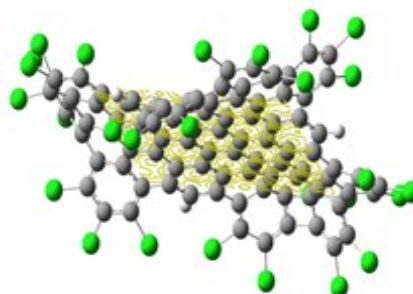

C5 (ESP -3146.94 au)

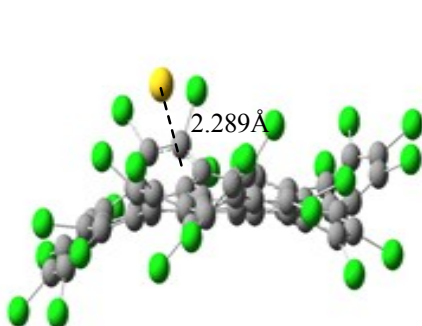

C4-Au

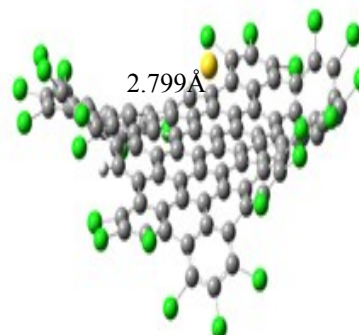

C5-Au

Suppleme

ntary Figure 1. The optimized structures for C4 (C<sub>60</sub>Cl<sub>24</sub>), C5 (C<sub>96</sub>Cl<sub>27</sub>H<sub>3</sub>), C4-Au and C5-Au complexes along with the ESP potential surface for the isolated monomers.

| Complexes | HL gap (eV) | Dipole Moment(D) | polarizability | ESP (au) | Energy (ev) | Energy (ev)vdW | Bond distance (Å) |
|-----------|-------------|------------------|----------------|----------|-------------|----------------|-------------------|
| C4        | 2.09        | 1.933            | -243.11        | -2189.11 | -587.35     | -              |                   |
| C5        | 2.31        | 0.932            | -244.78        | -3146.94 | -937.96     | -              |                   |
| C4-Au     | 2.03        | 1.311            | -253.77        | -        | -591.22     | -593.23        | 2.289             |
| C5-Au     | 2.01        | 1.342            | -251.33        | -        | -941.11     | -944.32        | 2.799             |

Supplementary Table 1. The HOMO-LUMO (HL) gap (eV), ground state dipole moment(D), polarizability, ESP values (monomers) and energy of the studied complexes. The eigen values and eigenstates of the Kohn-Sham Hamiltonian have been calculated at  $\Gamma$  point only of a cubic cell of side (C4-22.077 Å, C5-27.360Å, C4-Au-25.399Å, C5-Au-30.077Å). All the other computational details are given in the manuscript.

| Complexes | Wavelength (nm) | Oscillatory strength ( <i>f</i> ) | Transitions | $\mu_E$ (D) |
|-----------|-----------------|-----------------------------------|-------------|-------------|
| C4        | 462.52          | 0.2847                            | H→L+3 (50%) | 4.97        |
| C5        | 645.81          | 0.0001                            | H→L (80%)   | 4.72        |
| C4-Au     | 444.52          | 0.0022                            | H→L+2(55%)  | 3.95        |
| C5-Au     | 532.11          | 0.2132                            | H→L+3(49%)  | 3.11        |

Supplementary Table 2. The Wavelength(nm), Oscillatory strength, transitions and excited state dipole moment of the studied complexes by TDDFT calculations
